# Supplementary material
Source: PubMed Central journal article supplement (PMC3657138)
Supplement: mmc1.pdf [file mmc1.pdf]

## **Vascular Risk Status as a Predictor of Later-life Depressive Symptoms: A Cohort Study**

### **Supplement**

#### **Sample Selection for Analysis 1**

Participants were eligible for these analyses if they completed the health questionnaire at any two consecutive phases between Phase 3 and Phase 9 and had no missing data on disease status at the corresponding baseline phases. At each of the 3 data collection cycles, we successively excluded participants who had missing data on General Health Questionnaire (GHQ) symptoms at baseline ( $n = 188, 383$  and  $102$  at phases 3, 5 and 7); those who had GHQ symptoms at baseline ( $n = 1624, 2187$  and  $2522$ ); or had missing data on GHQ symptoms at follow-up ( $n = 486, 85$  and  $73$ ). Conversely, participants who did not have missing data or depressive symptoms in one data cycle were eligible to the next data cycle. The analysis was therefore based on 5230, 4029, and 3571 participants in the 1st, 2nd and 3rd data cycles, a total of 12,830 person-observations (Table S1). The corresponding figures for the analysis of antidepressant use were 7326, 6405 and 5890 respectively (a total of 19,621 person-observations). In the analysis on Center for Epidemiologic Studies Depression scale (CES-D) depressive symptoms (measured only at Phases 7 and 9), we excluded prevalent CES-D cases by restricting the analysis to 4509 participants in the last data cycle (4509 person-observations).

#### **Sample Selection for Analysis 2**

Participants were eligible for these analyses if they completed the health questionnaire and attended the screening at any two consecutive phases between Phase 3 and Phase 9. At the baseline of each of the 3 screening cycles, we successively excluded participants who had missing data on GHQ symptoms at baseline ( $n = 7, 141$  and  $66$  at phases 3, 5 and 7); those with prevalent coronary heart disease or stroke ( $n = 217, 370$  and  $518$  at Phases 3, 5 and 7, respectively), prevalent or previous GHQ symptoms ( $n = 1485, 1792$  and  $2163$ ), missing data on risk factors for the Framingham scores at baseline ( $n = 258, 547$  and  $126$ ); and missing data on GHQ symptoms at follow-up ( $n = 404, 57,$  and  $48$ ), leaving 4687, 2956, and 3013 participants for the analytic samples (a total of 10,656 person-observations) (Table S1). In the analysis of antidepressant use, the corresponding numbers of participants were 6339, 4474 and 4889 after the corresponding exclusions (15,702 person-observations). In the analyses for CES-D depressive symptoms, we excluded prevalent CES-D depressive symptoms by restricting the analysis to the 2786 participants in the last data cycle (a total of 2786 person-observations).

### **Analysis of Sample Retention and Unadjusted Relationships**

Table S2 shows characteristics of the participants included in Analysis 1 (test of prevalence disease-depressive symptoms association) and Analysis 2 (test of risk score-depressive symptoms associations among participants with no vascular disease at baseline) and those excluded from these analyses. Any differences between the groups were relatively small.

Tables S3 and S4 present unadjusted odds ratios for associations of Framingham risk scores and incident depressive symptoms. We found higher scores to be associated with a reduced likelihood of early-onset GHQ symptoms but, as shown in Table S4, these negative associations disappeared after adjustment for age and sex. Irrespective of adjustments, there were no associations between the vascular risk scores and late-life GHQ symptoms. This apparently paradoxical finding is likely to be due to confounding by age, as Framingham risk scores increase with increasing age, corresponding to the higher risk of vascular disease in elderly individuals, but the prevalence of GHQ symptoms decreased between the ages of 40 and 60 and subsequently remained relatively stable at older ages. These contrasting age-related trends explain the unadjusted inverse association of vascular risk with incidence of depression which disappeared after adjustment for age and sex. Unadjusted associations of risk scores with CES-D depressive symptoms and antidepressant use were all null.

### **Sensitivity Analysis**

Sensitivity analysis was based on a subgroup of Phase 5 participants with no current or previous GHQ symptoms, no current or previous use of antidepressant medication and with no history of depression according to the Composite International Diagnostic Interview (CIDI), a total of 1635 participants (1309 men and 326 women at age 45 to 68 years). The following covariates were assessed: marital status (married/co-habiting vs. single vs. widowed/separated/divorced); socioeconomic status (low vs. intermediate vs. high last known occupational position); retirement (yes vs. no); education level (lower secondary school or less vs. higher secondary school vs. university or higher degree); cognitive impairment (the 30-item Mini Mental State Examination < 24); body mass index (weight in kilograms/height in meters<sup>2</sup>); alcohol intake (none vs. moderate [1 to 14 units per week in women and 1 to 21 units per week in men] vs. high [>14 units in women and >21 in men]); menopausal status for women (yes vs. no); and non vascular chronic condition (yes vs. no).

**Table S1.** Study design and number of participants at baseline and follow-up examinations.

| Baseline examination                                                               | Eligible participants <sup>a</sup> |   | Number after exclusions <sup>b</sup> |   | Follow-up examination |
|------------------------------------------------------------------------------------|------------------------------------|---|--------------------------------------|---|-----------------------|
| Analysis 1 (Vascular & non-vascular diseases as predictors of depressive symptoms) |                                    |   |                                      |   |                       |
| Phase 3 (1991-1993)                                                                |                                    |   |                                      |   | Phase 5 (1997-1999)   |
| Men                                                                                | 5246                               | → | 3769                                 | → | 541 new-onset cases   |
| Women                                                                              | 2282                               | → | 1461                                 | → | 289 new-onset cases   |
| Total                                                                              | 7528                               | → | 5230                                 | → | 830 new-onset cases   |
| Phase 5 (1997-1999)                                                                |                                    |   |                                      |   | Phase 7 (2003-2004)   |
| Men                                                                                | 4699                               | → | 2985                                 | → | 338 new-onset cases   |
| Women                                                                              | 1985                               | → | 1044                                 | → | 146 new-onset cases   |
| Total                                                                              | 6684                               | → | 4029                                 | → | 484 new-onset cases   |
| Phase 7 (2003-2004)                                                                |                                    |   |                                      |   | Phase 9 (2008-2009)   |
| Men                                                                                | 4441                               | → | 2661                                 | → | 172 new-onset cases   |
| Women                                                                              | 1827                               | → | 910                                  | → | 71 new-onset cases    |
| Total                                                                              | 6268                               | → | 3571                                 | → | 243 new-onset cases   |
| All Phases – total number of person-observations                                   | 20480                              | → | 12830                                | → | 1577 new-onset cases  |
| Analysis 2 (Framingham risk scores as predictors of depressive symptoms)           |                                    |   |                                      |   |                       |
| Phase 3 (1991-1993)                                                                |                                    |   |                                      |   | Phase 5 (1997-1999)   |
| Men                                                                                | 4939                               | → | 3380                                 | → | 481 new-onset cases   |
| Women                                                                              | 2119                               | → | 1307                                 | → | 253 new-onset cases   |
| Total                                                                              | 7058                               | → | 4687                                 | → | 734 new-onset cases   |
| Phase 5 (1997-1999)                                                                |                                    |   |                                      |   | Phase 7 (2003-2004)   |
| Men                                                                                | 4170                               | → | 2219                                 | → | 255 new-onset cases   |
| Women                                                                              | 1680                               | → | 737                                  | → | 94 new-onset cases    |
| Total                                                                              | 5850                               | → | 2956                                 | → | 349 new-onset cases   |
| Phase 7 (2003-2004)                                                                |                                    |   |                                      |   | Phase 9 (2008-2009)   |
| Men                                                                                | 4230                               | → | 2243                                 | → | 133 new-onset cases   |
| Women                                                                              | 1698                               | → | 770                                  | → | 57 new-onset cases    |
| Total                                                                              | 5928                               | → | 3013                                 | → | 190 new-onset cases   |
| All Phases – total number of person-observations                                   | 18836                              | → | 10656                                | → | 1273 new-onset cases  |

CES-D, Center for Epidemiologic Studies Depression Scale; CHD, coronary heart disease; GHQ, General Health Questionnaire.

<sup>a</sup> Eligible participants are those who attended both the baseline and follow-up examination (see methods section).

<sup>b</sup> Number of participants after exclusion of participants with GHQ-symptoms or missing data (Analysis 1) or with prevalent CHD or stroke (Analysis 2). For analyses of CES-D depressive symptoms and antidepressant medication use, the figures are not exactly the same.

**Table S2.** Characteristics of the participants in 1991-1993 and the entire Whitehall II population at study inception in 1985-1988.

| Characteristic                                      | Phase 1 characteristics of the cohort |                          | Phase 3 characteristics of participants |                        |
|-----------------------------------------------------|---------------------------------------|--------------------------|-----------------------------------------|------------------------|
|                                                     | Excluded from Analysis 2              | Included in Analysis 2   | Included in Analysis 2                  | Included in Analysis 1 |
| Number of participants                              | 4545                                  | 5763                     | 5230 <sup>a</sup>                       | 4687 <sup>b</sup>      |
| Mean age (SD), y                                    | 44.3 (6.1)                            | 44.6 (6.1)               | 49.9 (6.1)                              | 49.8 (6.1)             |
| Women, <i>n</i> (%)                                 | 1790 (39.4)                           | 1623 (28.2)              | 1461 (27.9)                             | 1307 (27.9)            |
| White, <i>n</i> (%)                                 | 3853 (87.4)                           | 5120 (91.7)              | 4658 (91.9)                             | 4171 (91.8)            |
| Mean blood pressure (SD), mm Hg                     |                                       |                          |                                         |                        |
| Systolic                                            | 123.4 (15.3)                          | 122.9 (14.3)             | 120.8 (13.5)                            | 120.6 (13.5)           |
| Diastolic                                           | 77.1 (10.6)                           | 76.8 (9.9)               | 79.8 (9.3)                              | 79.8 (9.3)             |
| Use of antihypertensive medication, <i>n</i> (%)    | 185 (4.2)                             | 144 (2.6)                | 326 (6.3)                               | 260 (5.6)              |
| Diabetes mellitus, <i>n</i> (%)                     | 57 (1.3)                              | 37 (0.6)                 | 139 (2.9)                               | 121 (2.6)              |
| Current smoker, <i>n</i> (%)                        | 1059 (23)                             | 827 (14)                 | 624 (11.9)                              | 552 (11.8)             |
| Total cholesterol, mmol/L                           | 5.98 (1.20)                           | 5.94 (1.14)              | 6.50 (1.16)                             | 6.49 (1.15)            |
| HDL-cholesterol, mmol/L                             | 1.49 (0.44) <sup>c</sup>              | 1.49 (0.41) <sup>c</sup> | 1.42 (0.41)                             | 1.43 (0.41)            |
| Use of lipid-lowering drugs, <i>n</i> (%)           | 1 (0.0)                               | 1 (0.0)                  | 38 (0.7)                                | 30 (0.6)               |
| Use of antidepressant medication, <i>n</i> (%)      | -                                     | -                        | 57 (1.1)                                | 46 (1.0)               |
| Atrial fibrillation, <i>n</i> (%)                   | -                                     | -                        | 24 (0.5)                                | 22 (0.5)               |
| Left ventricular hypertrophy, <i>n</i> (%)          | -                                     | -                        | 212 (4.1)                               | 194 (4.1)              |
| Coronary heart disease (MI or angina), <i>n</i> (%) | 61 (1.3)                              | 47 (0.8)                 | 132 (2.5)                               | 0 (0.0)                |
| History of stroke, <i>n</i> (%)                     | -                                     | -                        | 8 (0.2)                                 | 0 (0.0)                |
| Framingham cardiovascular score, mean (SD)          | -                                     | -                        | -                                       | 0.099 (0.074)          |
| Framingham coronary heart disease score, mean (SD)  | -                                     | -                        | -                                       | 0.092 (0.065)          |
| Framingham stroke score, mean (SD)                  | -                                     | -                        | -                                       | 0.034 (0.017)          |
| GHQ-case, <i>n</i> (%)                              | 1535 (34)                             | 1209 (21)                | 0 (0.0)                                 | 0 (0.0)                |
| CES-D-depressive symptoms, <i>n</i> (%)             | -                                     | -                        | -                                       | -                      |

CES-D, Center for Epidemiologic Studies Depression Scale; GHQ, General Health Questionnaire; HDL, high-density lipoprotein; MI, myocardial infarction.

<sup>a</sup> Of the 5763 participants contributing to analysis 1, 533 participants did not contribute to the first cycle of data from Phase 3 to Phase 5.

<sup>b</sup> Of the 5318 participants contributing to analysis 2, 631 participants did not contribute to the first cycle of data from Phase 3 to Phase 5.

<sup>c</sup> Data available only for a subsample (*n* = 696 excluded from Analysis 2, 1003 included in Analysis 2).

**Table S3.** Unadjusted association between Framingham risk scores and onset of depressive symptoms in all age groups.

| <b>Outcome</b>                      | <b>Predictor<sup>a</sup></b> | <b><i>n</i><sup>b</sup></b> | <b><i>n</i> of cases</b> | <b>Odds ratio<br/>(95% CI)</b> | <b><i>P</i>-Value</b> |
|-------------------------------------|------------------------------|-----------------------------|--------------------------|--------------------------------|-----------------------|
| New-onset GHQ-symptoms              | CVD risk score               | 10,656                      | 1273                     | 0.69 (0.63, 0.75)              | <0.001                |
|                                     | CHD risk score               | 10,656                      | 1273                     | 0.72 (0.66, 0.80)              | <0.001                |
|                                     | Stroke risk score            | 10,656                      | 1273                     | 0.43 (0.33, 0.55)              | <0.001                |
| New-onset CES-D-depressive symptoms | CVD risk score               | 2786                        | 98                       | 1.06 (0.88, 1.29)              | 0.52                  |
|                                     | CHD risk score               | 2786                        | 98                       | 1.08 (0.82, 1.41)              | 0.59                  |
|                                     | Stroke risk score            | 2786                        | 98                       | 1.21 (0.81, 1.81)              | 0.35                  |
| Starting antidepressant treatment   | CVD risk score               | 15,702                      | 315                      | 0.93 (0.81, 1.06)              | 0.28                  |
|                                     | CHD risk score               | 15,702                      | 315                      | 0.95 (0.81, 1.13)              | 0.59                  |
|                                     | Stroke risk score            | 15,702                      | 315                      | 0.65 (0.43, 1.00)              | 0.05                  |

CES-D, Center for Epidemiologic Studies Depression Scale; CHD, coronary heart disease; CI, confidence interval; CVD, cardiovascular disease; GHQ, General Health Questionnaire.

<sup>a</sup> Per 10% increase in risk.

<sup>b</sup> Number of person-observations.

**Table S4.** Age-stratified analysis: Unadjusted association between Framingham risk scores and onset of depressive symptoms before and after age 65.

| Outcome                             | Predictor <sup>a</sup> | Age at onset <65      |                   |                     |                 | Ages ≥65 (Late life) |                   |                     |                 |
|-------------------------------------|------------------------|-----------------------|-------------------|---------------------|-----------------|----------------------|-------------------|---------------------|-----------------|
|                                     |                        | <i>n</i> <sup>b</sup> | <i>n</i> of cases | Odds ratio (95% CI) | <i>P</i> -Value | <i>n</i>             | <i>n</i> of cases | Odds ratio (95% CI) | <i>P</i> -Value |
| New-onset GHQ-symptoms              | CVD risk score         | 9445                  | 1184              | 0.67 (0.61, 0.74)   | <0.001          | 1211                 | 89                | 0.94 (0.78, 1.14)   | 0.52            |
|                                     | CHD risk score         | 9445                  | 1184              | 0.73 (0.65, 0.81)   | <0.001          | 1211                 | 89                | 0.95 (0.74, 1.22)   | 0.69            |
|                                     | Stroke risk score      | 9445                  | 1184              | 0.38 (0.28, 0.53)   | <0.001          | 1211                 | 89                | 0.85 (0.56, 1.28)   | 0.43            |
| New-onset CES-D-depressive symptoms | CVD risk score         | 1916                  | 59                | 0.99 (0.72, 1.36)   | 0.94            | 870                  | 39                | 0.99 (0.75, 1.31)   | 0.94            |
|                                     | CHD risk score         | 1916                  | 59                | 1.15 (0.78, 1.69)   | 0.49            | 870                  | 39                | 0.87 (0.57, 1.31)   | 0.50            |
|                                     | Stroke risk score      | 1916                  | 59                | 1.56 (0.72, 3.39)   | 0.26            | 870                  | 39                | 0.82 (0.44, 1.54)   | 0.53            |
| Starting antidepressant treatment   | CVD risk score         | 14,045                | 283               | 0.88 (0.75, 1.04)   | 0.13            | 1657                 | 32                | 1.09 (0.82, 1.45)   | 0.56            |
|                                     | CHD risk score         | 14,045                | 283               | 0.95 (0.78, 1.16)   | 0.62            | 1657                 | 32                | 0.98 (0.64, 1.48)   | 0.91            |
|                                     | Stroke risk score      | 14,045                | 283               | 0.42 (0.22, 0.79)   | 0.008           | 1657                 | 32                | 0.96 (0.52, 1.80)   | 0.91            |

CES-D, Center for Epidemiologic Studies Depression Scale; CHD, coronary heart disease; CI, confidence interval; CVD, cardiovascular disease; GHQ, General Health Questionnaire.

<sup>a</sup> Per 10% increase in risk.

<sup>b</sup> Number of person-observations.
